# Supplementary material
Source: publisher figshare collection journal article supplement (https://frontiersin.figshare.com/ndownloader/files/17944034)
Supplement: Supplementary file [file 17944034]

Supplementary Table 3 - Pairwise single nucleotide polymorphism counts between strains of ST744 strains under investigation. The reference strain utilised was Liv111M.

|            |     |     |     |     |     |     |     |     |
|------------|-----|-----|-----|-----|-----|-----|-----|-----|
| Liv111M_R1 | 0.0 | 0.0 | 2.0 | 5.0 | 4.0 | 2.0 | 1.0 | 0.0 |
| Liv30MA_R1 | 0.0 | 0.0 | 2.0 | 5.0 | 4.0 | 2.0 | 1.0 | 0.0 |
| Liv37_R1   | 2.0 | 2.0 | 0.0 | 7.0 | 6.0 | 4.0 | 3.0 | 2.0 |
| Liv43M_R1  | 5.0 | 5.0 | 7.0 | 0.0 | 9.0 | 3.0 | 6.0 | 5.0 |
| Liv53M_R1  | 4.0 | 4.0 | 6.0 | 9.0 | 0.0 | 6.0 | 5.0 | 4.0 |
| Liv67_R1   | 2.0 | 2.0 | 4.0 | 3.0 | 6.0 | 0.0 | 3.0 | 2.0 |
| Liv95_R1   | 1.0 | 1.0 | 3.0 | 6.0 | 5.0 | 3.0 | 0.0 | 1.0 |
| Reference  | 0.0 | 0.0 | 2.0 | 5.0 | 4.0 | 2.0 | 1.0 | 0.0 |
